# Supplementary material for: A one-pot CRISPR-RCA strategy for ultrasensitive and specific detection of circRNA
Source: Royal Society of Chemistry journal article supplement (doi:10.1039/d4ay00693c), 2024-01-01
Supplement: d4ay00693c1.pdf [file d4ay00693c1.pdf]

## ***Supporting Information***

### **A One-Pot CRISPR-RCA Strategy for Ultrasensitive and Specific Detection of circRNA**

*Xinxin Ke<sup>a</sup>, Ajuan Liang<sup>d</sup>, Chuanxia Chen<sup>c\*</sup>, Tao Hu<sup>a,b\*</sup>*

<sup>a</sup>The Children's Hospital, Zhejiang University School of Medicine, National Clinical Research Center for Child Health, Hangzhou, Zhejiang 310052, China.

<sup>b</sup>School of Basic Medical Sciences & Forensic Medicine, Hangzhou Medical College, Hangzhou 310000, China.

<sup>c</sup>School of Materials Science and Engineering University of Jinan, Jinan 250022, China.

<sup>d</sup>Department of Obstetrics, Shanghai First Maternity and Infant Hospital, Obstetrics and Gynecology Hospital, School of Medicine, Tongji University, Shanghai 201204, China.

\*Corresponding authors: [hutaozd@zju.edu.cn](mailto:hutaozd@zju.edu.cn); [mse\\_chencx@ujn.edu.cn](mailto:mse_chencx@ujn.edu.cn)

This document includes:

Figures S1 to S5

Tables S1 to S2



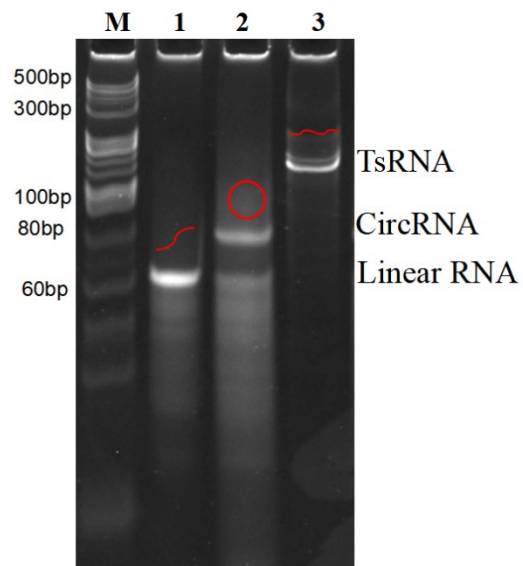

**Figure S2.** Denaturing PAGE was employed for the separation and purification of the obtained circRNA. Lane M: DNA marker; Lane 1: linear RNA; Lane 2: post-ligation; Lane 3: tsRNA.

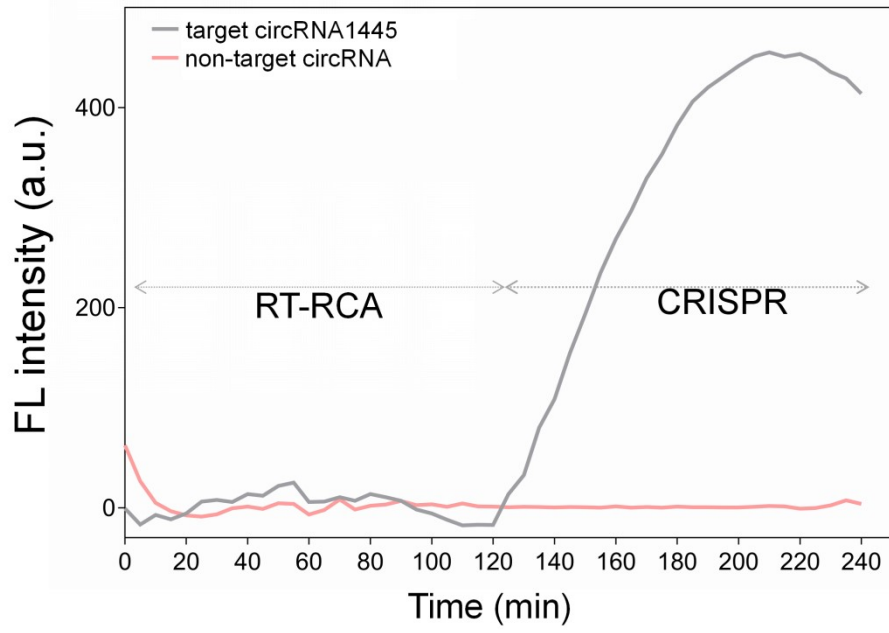

**Figure S3.** Real-time fluorescence monitoring assay demonstrating the feasibility of the two-step assay. The gray arrow indicates the time of two-step process.

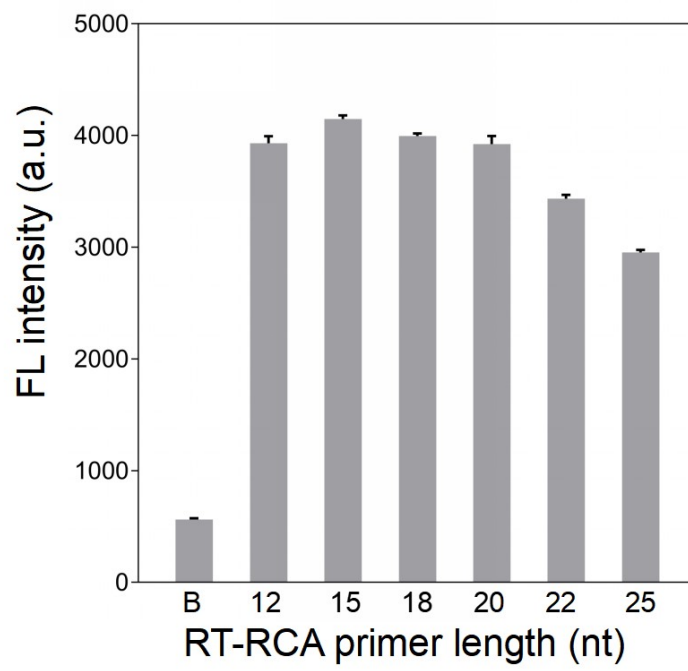

**Figure S4.** Fluorescence intensity as a function of primer length of the RT-RCA .

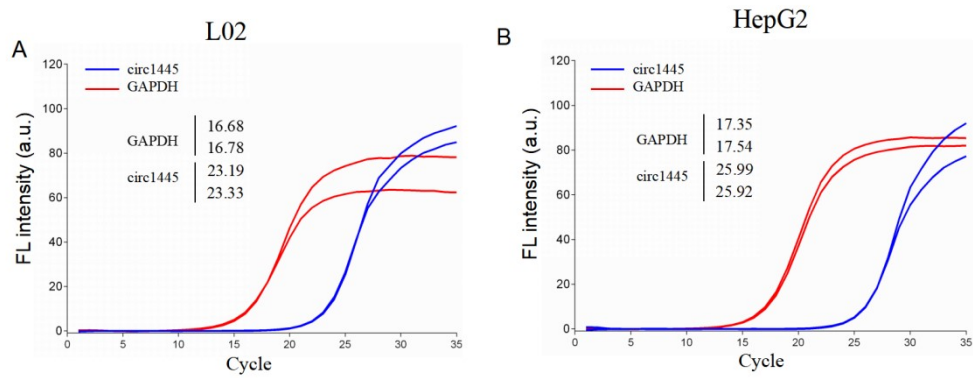

**Figure S5.** (A) The real-time reverse transcription PCR for circRNA1445 and GAPDH in LO2 cell. (B) The real-time reverse transcription PCR for circRNA1445 and GAPDH in HepG2 cell. GAPDH was employed as the universal endogenous control.

## Supplementary tables

**Table S1.** DNA and RNA sequences used in this study.

| Name                 | Sequence (5'-3')                                                                                                                     | Purpose               |
|----------------------|--------------------------------------------------------------------------------------------------------------------------------------|-----------------------|
| P-linear RNA         | P-<br>UUGGAAAGAUGAAAUGCUUAAAACAAAAGGGAGG<br>CUUGUGGAUCAGAAUCUGAACAAAA                                                                | For cicrRNA formation |
| Ligation primer      | AAGCATTTTCATCTTTCCCAATTTTGTTTCAGATTCTGAT<br>CC                                                                                       | For cicrRNA formation |
| Linear RNA           | GGAGGCUUGUGGAUCAGAAUCUGAACAAAAUUGGG<br>AAAGAUGAAAUGCUUAAAACAAAAG                                                                     | For specificity       |
| TsRNA                | GGAGGCUUGUGGAUCAGAAUCUGAACAAAAUUGGG<br>AAAGAUGAAAUGCUUAAAACAAAAGGGAGGCUUGU<br>GGAUCAGAAUCUGAACAAAAUUGGGAAAGAUGAAA<br>UGC UAAAACAAAAG | For specificity       |
| RT primer-12nt       | AAGCATTTTCATC                                                                                                                        | RT-RCA                |
| RT primer-15nt       | AAGCATTTTCATCTTT                                                                                                                     | RT-RCA                |
| RT primer-18nt       | AAGCATTTTCATCTTTCCC                                                                                                                  | RT-RCA                |
| RT primer-20nt       | AAGCATTTTCATCTTTCCCAA                                                                                                                | RT-RCA                |
| RT primer-22nt       | AAGCATTTTCATCTTTCCCAATT                                                                                                              | RT-RCA                |
| RT primer-25nt       | AAGCATTTTCATCTTTCCCAATTTTG                                                                                                           | RT-RCA                |
| crRNA-1              | UAAUUUCUACUAAGUGUAGAUAAAACAAAAGGGAG<br><u>GCUUGUG</u>                                                                                | Target recognition    |
| crRNA-2              | UAAUUUCUACUAAGUGUAGAU <u>G</u> AUCAGAAUCUGAA<br><u>CAAAA</u>                                                                         | Target recognition    |
| crRNA-3              | UAAUUUCUACUAAGUGUAGAU <u>GGAGGCUUGUGGAU</u><br><u>CAGAA</u>                                                                          | Target recognition    |
| crRNA-4              | UAAUUUCUACUAAGUGUAGAU <u>G</u> AAU <u>GC</u> UAAAAC<br><u>AAAAG</u>                                                                  | Target recognition    |
| crRNA-5              | UAAUUUCUACUAAGUGUAGAU <u>A</u> AGAUGAAAUGCGG<br><u>AAAACAA</u>                                                                       | Target recognition    |
| crRNA-8nt            | UAAUUUCUACUAAGUGUAGAU <u>AAAGGGAG</u>                                                                                                | Target recognition    |
| crRNA-10nt           | UAAUUUCUACUAAGUGUAGAU <u>AAAAGGGAGG</u>                                                                                              | Target recognition    |
| crRNA-16nt           | UAAUUUCUACUAAGUGUAGAU <u>AAAACAAAAGGGAGG</u><br><u>CG</u>                                                                            | Target recognition    |
| crRNA-21nt           | UAAUUUCUACUAAGUGUAGAUAAAACAAAAGGGAG<br><u>GCUUGUG</u>                                                                                | Target recognition    |
| crRNA-24nt           | UAAUUUCUACUAAGUGUAGAU <u>T</u> AAAACAAAAGGG<br><u>AGGCGGGATC</u>                                                                     | Target recognition    |
| crRNA-26nt           | UAAUUUCUACUAAGUGUAGAU <u>CT</u> AAAACAAAAGG<br><u>GAGGCGGGATCA</u>                                                                   | Target recognition    |
| Target ssDNA without | AAGCATTTTCATCTTTCCCAATTTTGTTTCAGATTCTGAT                                                                                             | Cas12 reaction        |

|                              |                                                                           |                         |
|------------------------------|---------------------------------------------------------------------------|-------------------------|
| PAM                          | <u>CCACAAGCCTCCCTTTTGT</u>                                                | analysis                |
| Target ssDNA with PAM        | AAGCATTTTCATCTTTCCCAATTTTGTTCAGATTCTGAT<br>CCACAAGCCTCCCTTTTGTGGAAACATT   | Cas12 reaction analysis |
| Target dsDNA without PAM-F   | <u>AAAACAAAAGGGAGGCTTGTGGATCAGAATCTGAAC</u><br>AAAATTGGGAAAGATGAAATGCTT   | Cas12 reaction analysis |
| Target dsDNA with PAM-F      | AATGTTTCAAAAACAAAAGGGAGGCTTGTGGATCAGA<br>ATCTGAACAAAATTGGGAAAGATGAAATGCTT | Cas12 reaction analysis |
| Non-target ssDNA without PAM | TGGCATTTGGCCTGGTGTGTGCAACATGTGAGCAGAT<br>TGC                              | Cas12 reaction analysis |
| Non-target ssDNA with PAM    | TGGCATTTGGCCTGGTGTGTGCAACATGTGAGCAGAT<br>TGC                              | Cas12 reaction analysis |
| Non-target dsDNA with PAM-F  | AATGTTTCGCAATCTGCTCACATGTTGCACACACCAG<br>GCCAAATGCCA                      | Cas12 reaction analysis |
| C1445-1QF                    | CTTGTGGATCAGAATCTGAACA                                                    | QPCR for comparison     |
| C1445-1QR                    | CCTCCCTTTTGTTTAAGCA                                                       | QPCR for comparison     |
| GAPDH-QF                     | AGAAGGCTGGGGCTCATTG                                                       | For cell QPCR analysis  |
| GAPDH-QR                     | GCAGGAGGCATTGCTGATGAT                                                     | For cell QPCR analysis  |
| C1445-QF                     | TGGGCGAAAGTTCACCTAGAA                                                     | For cell QPCR analysis  |
| C1445-QR                     | CACATGTGTTGCTCCATGTCT                                                     | For cell QPCR analysis  |
| C1445-PF                     | ACTTCGAAGGAGAAGACTATAGAG                                                  | For PCR                 |
| C1445-PR                     | CACTTGACTCTGTATCCATTGT                                                    | For PCR                 |



**Table S2.** Comparison biosensors for circRNA detection between our work and other methods.

| <b>No.</b> | <b>Signal readout</b> | <b>LOD</b> | <b>Time ( min )</b> | <b>On-site diagnosis</b> | <b>References</b> |
|------------|-----------------------|------------|---------------------|--------------------------|-------------------|
| 1          | Fluorescence          | 1 fM       | -                   | No                       | (1)               |
| 2          | Fluorescence          | 1.1 fM     | 140                 | Yes                      | (2)               |
| 3          | Fluorescence          | 0.1 pM     | 180                 | Yes                      | (3)               |
| 4          | Fluorescence          | 1 fM       | 30                  | Yes                      | (4)               |
| 5          | Electrochemical       | 3.5 fM     | 90                  | No                       | (5)               |
| 6          | Electrochemical       | 80 aM      | 10                  | No                       | (6)               |
| 7          | Fluorescence          | 100 pM     | 50                  | Yes                      | (7)               |
| 8          | Fluorescence          | 300 aM     | 30-120              | Yes                      | This work         |

## Supplementary references

### References

- (1) Zhang, P.; Guo, N.; Gao, K.; Su, F.; Wang, F.; Li, Z. Direct recognition and sensitive detection of circular RNA with ligation-based PCR. *Org Biomol Chem.* **2020**, 18(17):3269-3273.
- (2) Liu, Y.; Zhang, X.; Liu, M.; Xu, F.; Zhang, Q.; Zhang, Y.; Weng, X.; Liu, S.; Du, Y.; Zhou, X. Direct detection of circRNA in real samples using reverse transcription-rolling circle amplification. *Anal Chim Acta.* **2020**, 1101:169-175.
- (3) Dong, J.; Zeng, Z.; Sun, R.; Zhang, X.; Cheng, Z.; Chen, C.; Zhu, Q. Specific and sensitive detection of CircRNA based on netlike hybridization chain reaction. *Biosens Bioelectron.* **2021**, 192:113508.
- (4) Song, P.; Zhang, P.; Qin, K.; Su, F.; Gao, K.; Liu, X.; Li, Z. CRISPR/Cas13a induced exponential amplification for highly sensitive and specific detection of circular RNA. *Talanta.* **2022**, 246:123521.
- (5) Jiao, J.; Li, C.; Ning, L.; Shi, L.; Wang, L.; Xiang, Y.; Li, G. Electrochemical detection of circRNAs based on the combination of backsplice junction and duplex-specific nuclease. *SENSOR ACTUAT B-CHEM.* **2020**, 302, 127166.
- (6) Cheng, L.; Yang, F.; Zhao, Y.; Liu, Z.; Yao, X.; Zhang, J. Tetrahedron supported CRISPR/Cas13a cleavage for electrochemical detection of circular RNA in bladder cancer. *Biosens Bioelectron.* **2023**, 222:114982.
- (7) Zhao, G.; Yan, X.; Zhang, Y.; Deng, J.; Liang, X. Sensitive detection of MiRNA and CircRNA through DSN enzyme cooperating NEase assisted dual signal amplification. *Anal Biochem.* **2022**, 654:114744.
